# Supplementary material for: Causality analysis of CO2 emissions, foreign direct investment, gross domestic product, and energy consumption: Empirical evidence from SAARC countries
Source: Research Square preprint supplement (doi:10.21203/rs.3.rs-1237874/v1), 2022-01-28
Supplement: Supplementary file 1 [file fceadca6d968bb872f923807.docx]

**Appendix:**

| Model: | |
| --- | --- |
| Bangladesh | India |
| Nepal | Pakistan |
| Sri-Lanka | |
